# Supplementary material for: Effect of Long-Term Low-Dose Arsenic Exposure on DNA Methylation and Gene Expression in Human Liver Cells
Source: MDPI journal article supplement (doi:10.3390/ijms242015238), 2023-10-16
Supplement: s1 [file s1]

## Supplementary information to:

# Effect of long-term low-dose arsenic exposure on DNA methylation and gene expression in human liver cells

Sandra Stößer, Tatjana Lumpp, Franziska Fischer, Sarah Gunesch, Paul Schumacher and Andrea Hartwig\*

Department of Food Chemistry and Toxicology, Institute of Applied Biosciences (IAB), Karlsruhe Institute of Technology (KIT), 76131 Karlsruhe, Germany.

\* Correspondence: andrea.hartwig@kit.edu

**Supplementary Table S1:** Genes and the respective encoded proteins analysed in the present study. Genes marked with \* are reference genes.

| Gene          | Encoded protein                                                         |
|---------------|-------------------------------------------------------------------------|
| <i>ACTB</i> * | β-actin (ACTB)                                                          |
| <i>APAF1</i>  | apoptotic protease activating factor (APAF1)                            |
| <i>ATM</i>    | ataxia telangiectasia mutated (ATM)                                     |
| <i>ATR</i>    | ataxia telangiectasia and Rad3-related protein (ATR)                    |
| <i>B2M</i> *  | beta-2-Microglobulin (B2M)                                              |
| <i>BAX</i>    | bcl2-associated x protein (BAX)                                         |
| <i>BRCA1</i>  | breast cancer 1, early onset (BRCA1)                                    |
| <i>BRCA2</i>  | breast cancer 2, early onset (BRCA2)                                    |
| <i>BTRC</i>   | transducin repeat containing E3 ubiquitin protein ligase, beta (β-TrCP) |
| <i>CAT</i>    | catalase (CAT)                                                          |
| <i>CCL22</i>  | C-C motif chemokine ligand 22 (CCL22)                                   |
| <i>CCND1</i>  | cyclin D1 (CCND1)                                                       |
| <i>CDKN1A</i> | cyclin-dependent kinase inhibitor 1A (p21)                              |
| <i>CDKN1B</i> | cyclin-dependent kinase inhibitor 1B (p27)                              |
| <i>CDKN2A</i> | cyclin-dependent kinase inhibitor 2A (p16)                              |
| <i>CDKN2B</i> | cyclin-dependent kinase inhibitor 2B (p15)                              |
| <i>CDKN2D</i> | cyclin-dependent kinase inhibitor 2D (p19)                              |
| <i>COX2</i>   | cytochrome C oxidase assembly factor (COX2)                             |
| <i>DDB2</i>   | damage-specific DNA binding protein 2 (DDB2)                            |
| <i>DDIT3</i>  | DNA damage inducible transcript 3 (DDIT3)                               |
| <i>DNMT1</i>  | DNA methyltransferase 1 (DNMT1)                                         |
| <i>DNMT3A</i> | DNA methyltransferase 3A (DNMT3A)                                       |
| <i>DNMT3B</i> | DNA methyltransferase 3B (DNMT3B)                                       |
| <i>E2F1</i>   | E2F transcription factor 1 (E2F1)                                       |
| <i>EGFR</i>   | epidermal growth factor receptor (EGFR)                                 |

|                  |                                                                |
|------------------|----------------------------------------------------------------|
| <i>EHMT2/G9a</i> | euchromatic histone lysine methyltransferase 2(EHMT2)          |
| <i>EP300</i>     | E1A binding protein P300 (EP300)                               |
| <i>ERCC2</i>     | excision repair cross-complementation group 2 (XPD)            |
| <i>ERCC4</i>     | excision repair cross-complementation group 4 (XPF)            |
| <i>ERCC5</i>     | excision repair cross-complementation group 5 (XPG)            |
| <i>FOXO1</i>     | forkhead box O1 (FOXO1)                                        |
| <i>FOXO3</i>     | forkhead box O3 (FOXO3)                                        |
| <i>FTH1</i>      | ferritin heavy chain 1 (FTH1)                                  |
| <i>G6PD</i>      | glucose-6-phosphate dehydrogenase (G6PD)                       |
| <i>GADD45A</i>   | growth arrest and DNA-damage-inducible, alpha (GADD45A)        |
| <i>GAPDH*</i>    | glyceraldehyde-3-phosphate dehydrogenase (GAPDH)               |
| <i>GCLC</i>      | glutamate-cysteine ligase, catalytic subunit (GCL)             |
| <i>GPX1</i>      | glutathione peroxidase 1 (GPX1)                                |
| <i>GPX2</i>      | glutathione peroxidase 2 (GPX2)                                |
| <i>GSR</i>       | glutathione reductase (GSR)                                    |
| <i>GUSB*</i>     | glucuronidase, beta (GUSB)                                     |
| <i>HDAC1</i>     | histone deacetylase 1 (HDAC1)                                  |
| <i>HDAC10</i>    | histone deacetylase 10 (HDAC10)                                |
| <i>HDAC2</i>     | histone deacetylase 2 (HDAC2)                                  |
| <i>HDAC3</i>     | histone deacetylase 3 (HDAC3)                                  |
| <i>HMOX1</i>     | heme oxygenase (decycling) 1 (hMO-1)                           |
| <i>HPRT1*</i>    | hypoxanthine phosphoribosyltransferase 1 (HPRT1)               |
| <i>HSPA1A</i>    | heat shock 70kDa protein 1A (HSP70)                            |
| <i>IL1a</i>      | interleukin 1 alpha (IL1a)                                     |
| <i>IL1b</i>      | interleukin 1 beta (IL1b)                                      |
| <i>IL6</i>       | interleukin 6 (IL6)                                            |
| <i>IL8</i>       | interleukin 8 (IL8)                                            |
| <i>JUN</i>       | jun proto-oncogene (c-JUN)                                     |
| <i>KDM3A</i>     | lysine demethylase 3A (KDM3A)                                  |
| <i>KEAP1</i>     | kelch-like ECH-associated protein 1 (KEAP1)                    |
| <i>LIG1</i>      | ligase I, DNA, ATP-dependent (LIG1)                            |
| <i>LIG3</i>      | ligase III, DNA, ATP-dependent (LIG3)                          |
| <i>MAP3K5</i>    | mitogen-activated protein kinase kinase kinase 5 (MAP3K5/ASK1) |
| <i>MBD4</i>      | methyl-CpG binding domain 4 (MBD4)                             |
| <i>MDM2</i>      | MDM2 Proto-Oncogene (MDM2)                                     |
| <i>MeCP2</i>     | methyl-CpG binding protein 2 (MeCP2)                           |
| <i>MGMT</i>      | O-6-methylguanine-DNA methyltransferase (MGMT)                 |
| <i>MLH1</i>      | mutL homolog 1 (MLH1)                                          |
| <i>MSH2</i>      | mutS homolog 2 (MSH2)                                          |
| <i>MT1X</i>      | metallothionein 1X (MT1X)                                      |
| <i>MT2A</i>      | metallothionein 2A (MT2A)                                      |
| <i>MYC</i>       | v-myc avian myelocytomatosis viral oncogene homolog (c-MYC)    |

|                  |                                                                                            |
|------------------|--------------------------------------------------------------------------------------------|
| <i>NFKB1</i>     | nuclear factor of kappa light polypeptide gene enhancer in B-cells 1 (p50/p105)            |
| <i>NFKB2</i>     | nuclear factor of kappa light polypeptide gene enhancer in B-cells 2 (p49/p100)            |
| <i>NFKBIA</i>    | nuclear factor of kappa light polypeptide gene enhancer in B-cells inhibitor, alpha (IKBA) |
| <i>OGG1</i>      | 8-oxoguanine DNA glycosylase (hOGG1)                                                       |
| <i>PARP1</i>     | poly (ADP-ribose) polymerase 1 (PARP1)                                                     |
| <i>PLK3</i>      | polo-like kinase 3 (PLK3)                                                                  |
| <i>PMAIP1</i>    | phorbol-12-myristate-13-acetate-induced protein 1 (NOXA)                                   |
| <i>PRDX1</i>     | peroxiredoxin 1 (PRX1)                                                                     |
| <i>RAD50</i>     | RAD50 homolog ( <i>S. cerevisiae</i> ) (RAD50)                                             |
| <i>RAD51</i>     | RAD51 recombinase (RAD51)                                                                  |
| <i>RRM2B</i>     | ribonucleotide reductase M2B (TP53 inducible) (p53R2)                                      |
| <i>SETD2</i>     | SET Domain Containing 2 (SETD2)                                                            |
| <i>SIRT2</i>     | sirtuin 2 (SIRT2)                                                                          |
| <i>SLC30A1</i>   | solute carrier family 30 (zinc transporter), member 1 (ZnT1)                               |
| <i>SOD1</i>      | superoxide dismutase 1, soluble (SOD1)                                                     |
| <i>SOD2</i>      | superoxide dismutase 2, mitochondrial (SOD2/MnSOD)                                         |
| <i>TET1</i>      | tet methylcytosine Dioxygenase 1 (TET1)                                                    |
| <i>TET2</i>      | tet methylcytosine Dioxygenase 2 (TET2)                                                    |
| <i>TET3</i>      | tet methylcytosine Dioxygenase 3 (TET3)                                                    |
| <i>TGFb</i>      | transforming growth factor beta (TGFB)                                                     |
| <i>TNFa</i>      | tumor necrosis factor alpha (TNFalpha)                                                     |
| <i>TNFRSF10B</i> | tumor necrosis factor receptor superfamily, member 10b (DR5)                               |
| <i>TXN</i>       | thioredoxin (TXN)                                                                          |
| <i>TXNRD1</i>    | thioredoxin reductase 1 (TXNRD)                                                            |
| <i>VEGFA</i>     | vascular endothelial growth factor A (VEGFA)                                               |
| <i>XPA</i>       | xeroderma pigmentosum, complementation group A (XPA)                                       |
| <i>XPC</i>       | xeroderma pigmentosum, complementation group C (XPC)                                       |
| <i>XRCC5</i>     | X-ray repair complementing defective repair in Chinese hamster cells 5 (XRCC5)             |

**Supplementary Table S2: Detailed information on the primers newly established in addition to the existing gene set [16].**

| Gene          | RefSeq       | Sequence 5' --> 3'                                                      | Product size<br>[bp] | Annealing T <sub>m</sub><br>(°C) |
|---------------|--------------|-------------------------------------------------------------------------|----------------------|----------------------------------|
| <i>CDKN2A</i> | NM_000077    | fwd: CCCACTACCGTAAATGTCCATT<br>rev: GACTCAAGAGAAGCCAGTAACC              | 242                  | 66.5                             |
| <i>CDKN2D</i> | NM_001800    | fwd: TTGTGGCTTATAGGTGTTGGTT<br>rev: ACCGTTTAGGTGGCTGTG                  | 126                  | 66.4                             |
| <i>DNMT1</i>  | NM_001130823 | fwd: GGCAAACCACCATCACATCTCATT<br>rev: GCGGTCTAGCAACTCGTTCTCT            | 162                  | 67.9                             |
| <i>DNMT3A</i> | NM_022552    | fwd: CGGCAAATTCTCAGTGGTGTGT<br>rev: GCAGGACCTCGTAGATGGCTT               | 122                  | 67.8                             |
| <i>DNMT3B</i> | NM_006892    | fwd: CTCCTCCATATCTCCCTCTCCCTA<br>rev: ACTGCTGTCACTGCCTCTGA              | 181                  | 67.9                             |
| <i>EHMT2</i>  | NM_006709    | fwd: TCCGCATGAGTGATGATGTCCA<br>rev: CGCTCATCCACAGAGTAGGAATCA            | 223                  | 68                               |
| <i>EP300</i>  | NM_001429    | fwd: GTGCTGGCAACTTACTGACTGAG<br>rev: CACTGGCTCCAATCTGCTGTC              | 165                  | 67.6                             |
| <i>FOXO1</i>  | NM_002015    | fwd: ACCCAGCCCAAACCTACCA<br>rev: AGTCAGAAGTCAGCAACTCCTT                 | 161                  | 67.6                             |
| <i>FOXO3</i>  | NM_001455    | fwd: GTGTTCCGACCTTCATCTCTG<br>rev: TCGCTGTGGCTAAGTGAGT                  | 149                  | 66.8                             |
| <i>HDAC1</i>  | NM_004964    | fwd: GGGTCAAGGAGGAGGTCAAGTT<br>rev: GGA CTCAGCAGGAAGCCAGA               | 84                   | 67.5                             |
| <i>HDAC10</i> | NM_032019    | fwd: CTCTTAGATGGGATGCTGGATGG<br>rev: CTGATGTT CAGCCACAGACTCC            | 200                  | 66.4                             |
| <i>HDAC2</i>  | NM_001527    | fwd: GCCAGTTAGTATCAGTGAAGATTAACATCC<br>rev: TAGGCAAGTCTGGTCAATACAAGTTCT | 173                  | 67.5                             |
| <i>HDAC3</i>  | NM_001355039 | fwd: CCACTCCGAGGACTACATTGACT<br>rev: TTAAGACTCTTGGTGAAGCCTTGC           | 75                   | 67.6                             |
| <i>KDM3A</i>  | NM_001146688 | fwd: TGTGAGGAGATTCCAGCACTGAA<br>rev: CAGCTCCAATTCTTGCAGAATTACCA         | 106                  | 67.8                             |
| <i>MBD4</i>   | NM_003925    | fwd: GCCGAATGACCTCCGCAAAG<br>rev: GCAGAAGCGATGGGTTCTTGTAG               | 126                  | 68.2                             |
| <i>MeCP2</i>  | NM_004992    | fwd: CCGCTCTGCTGGGAAGTATGA<br>rev: GATTTGGGCTTCTTAGGTGGTTTCTG           | 192                  | 68.2                             |
| <i>SETD2</i>  | NM_014159    | fwd: CCCGACCCCTGAAGAAGAAGA<br>rev: GGCTGAAGCTGAATGACACCTT               | 176                  | 67.6                             |
| <i>TET1</i>   | NM_030625    | fwd: AACCTTAGGGAGTAACACTGAGACC<br>rev: GCGGATGGCATCAGCGAAT              | 114                  | 67.5                             |
| <i>TET2</i>   | NM_001127208 | fwd: CCTGTGATGCTGATGATGCTGATAA<br>rev: AATTGCTGCTGGAACCTGAACA           | 195                  | 67.2                             |
| <i>TET3</i>   | NM_001366022 | fwd: TCAAGGTGGAGCCGCAGAA<br>rev: TGGTAGGAGTACACGCTGTTT CAT              | 130                  | 68.1                             |

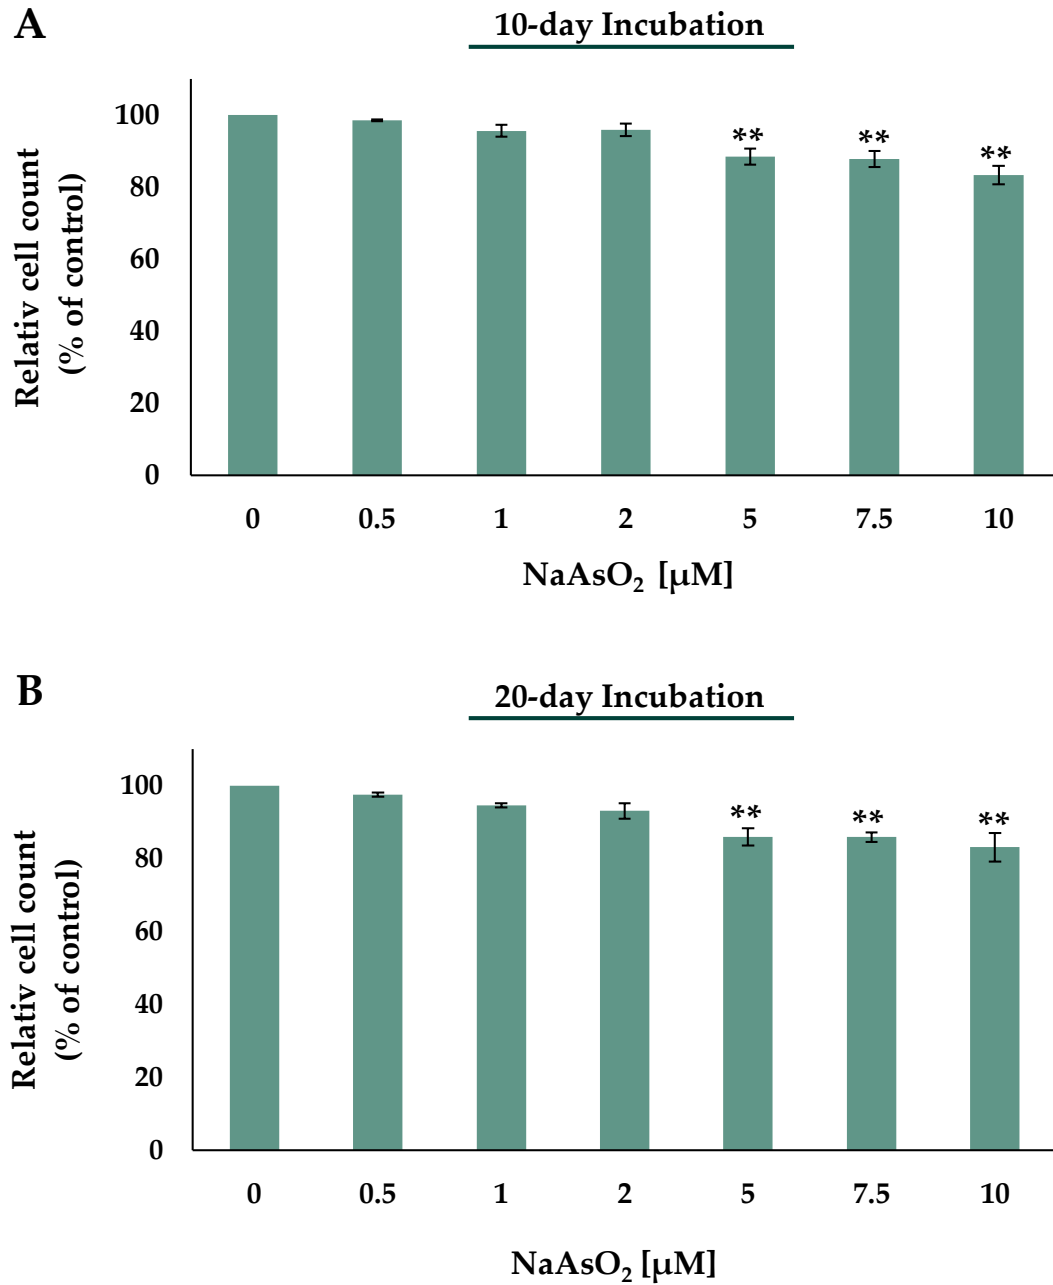

**Figure S1:** Relative cell counts of HepG2 cells after 10-day (A) as well as 20-day (B) exposure to NaAsO<sub>2</sub>. Mean values  $\pm$  standard deviations (SD) from three independent experiments are shown. Statistical analysis was performed to determine the differences between the exposed cells and the negative control using one-way ANOVA followed by Dunnett's post hoc test: \*\* ( $p \leq 0.01$ ).

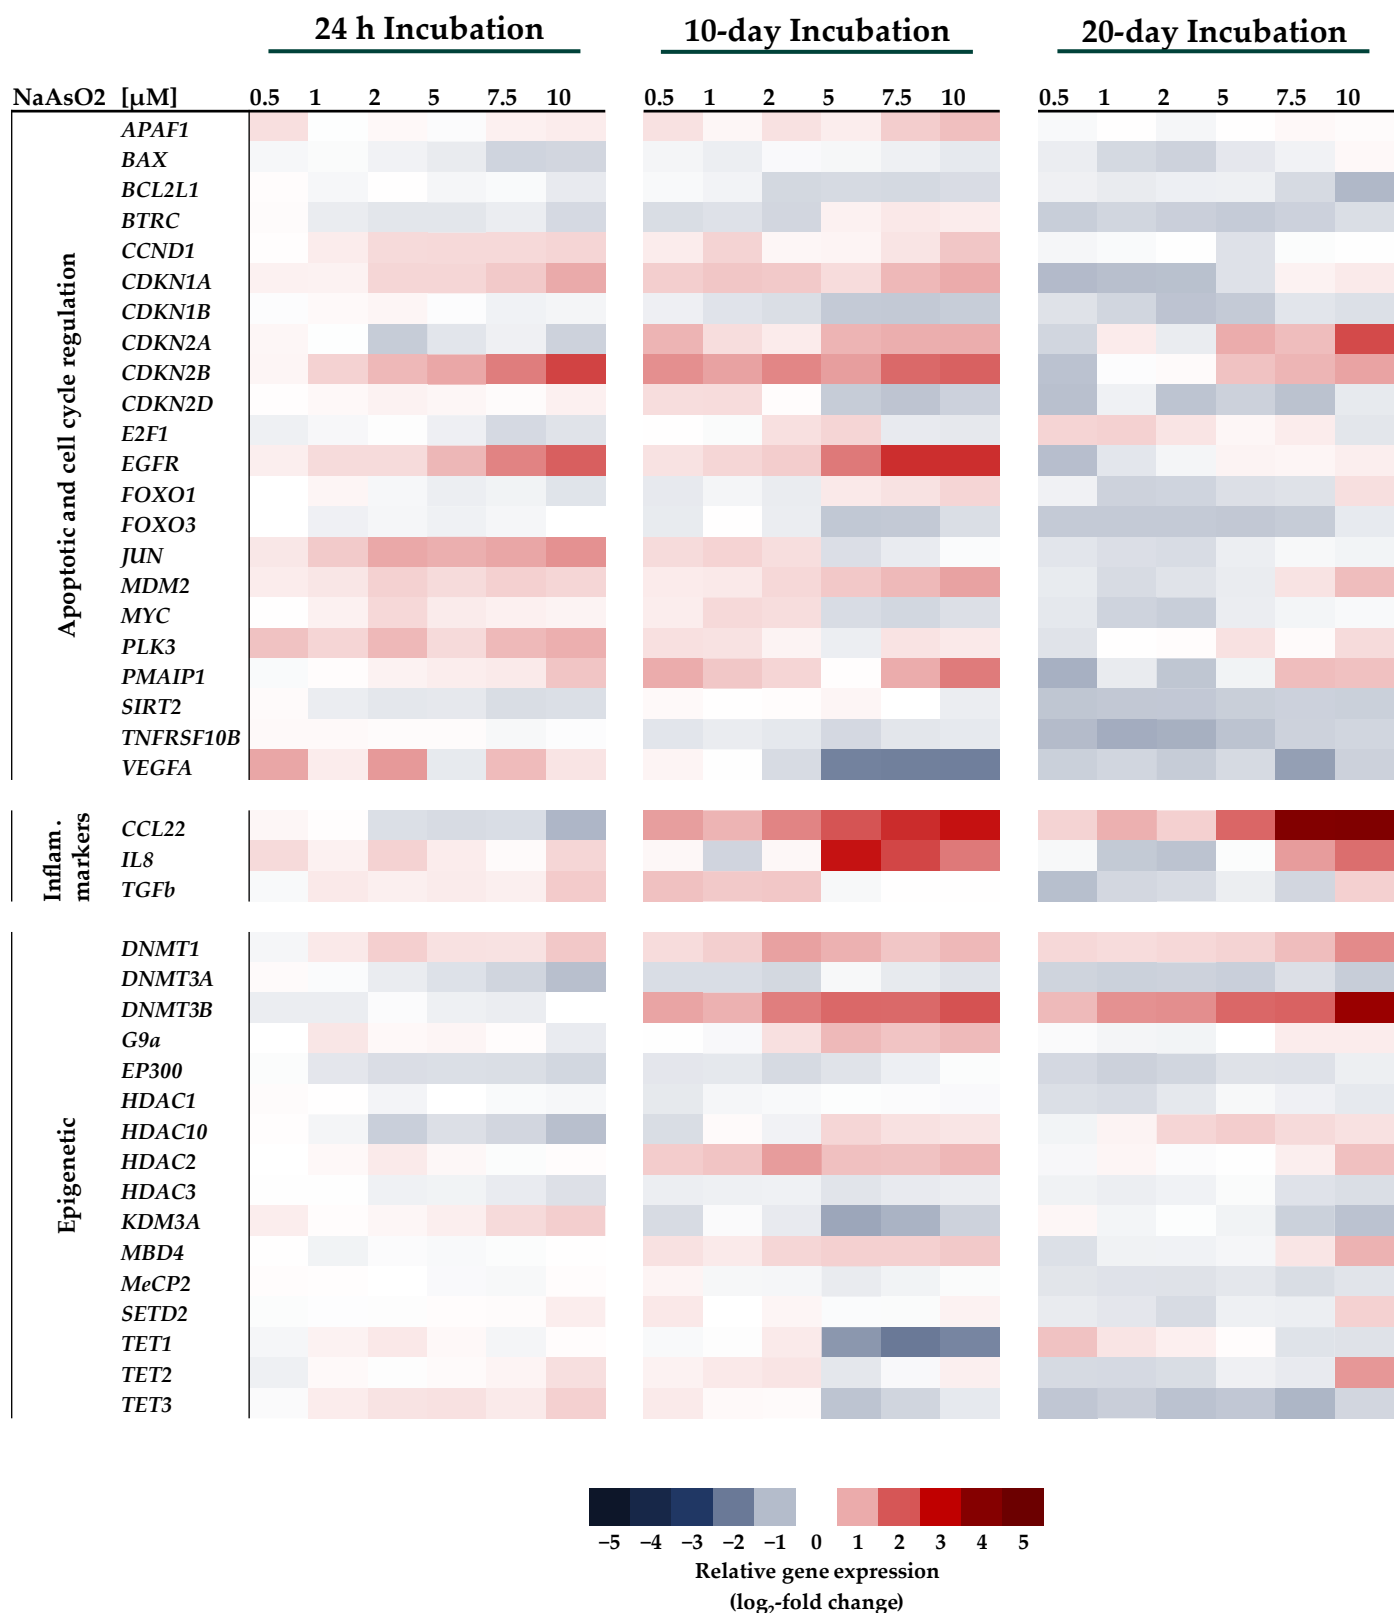

**Figure S2:** Gene expression profile of HepG2 cells after 24-hour, 10-day, and 20-day treatment with NaAsO<sub>2</sub>. The clusters of genes involved in cell cycle, apoptotic and senescence, inflammation and epigenetic regulation are presented. The log<sub>2</sub>-fold changes are provided for three independent experiments, normalized to the untreated control, where the control is set to 0.

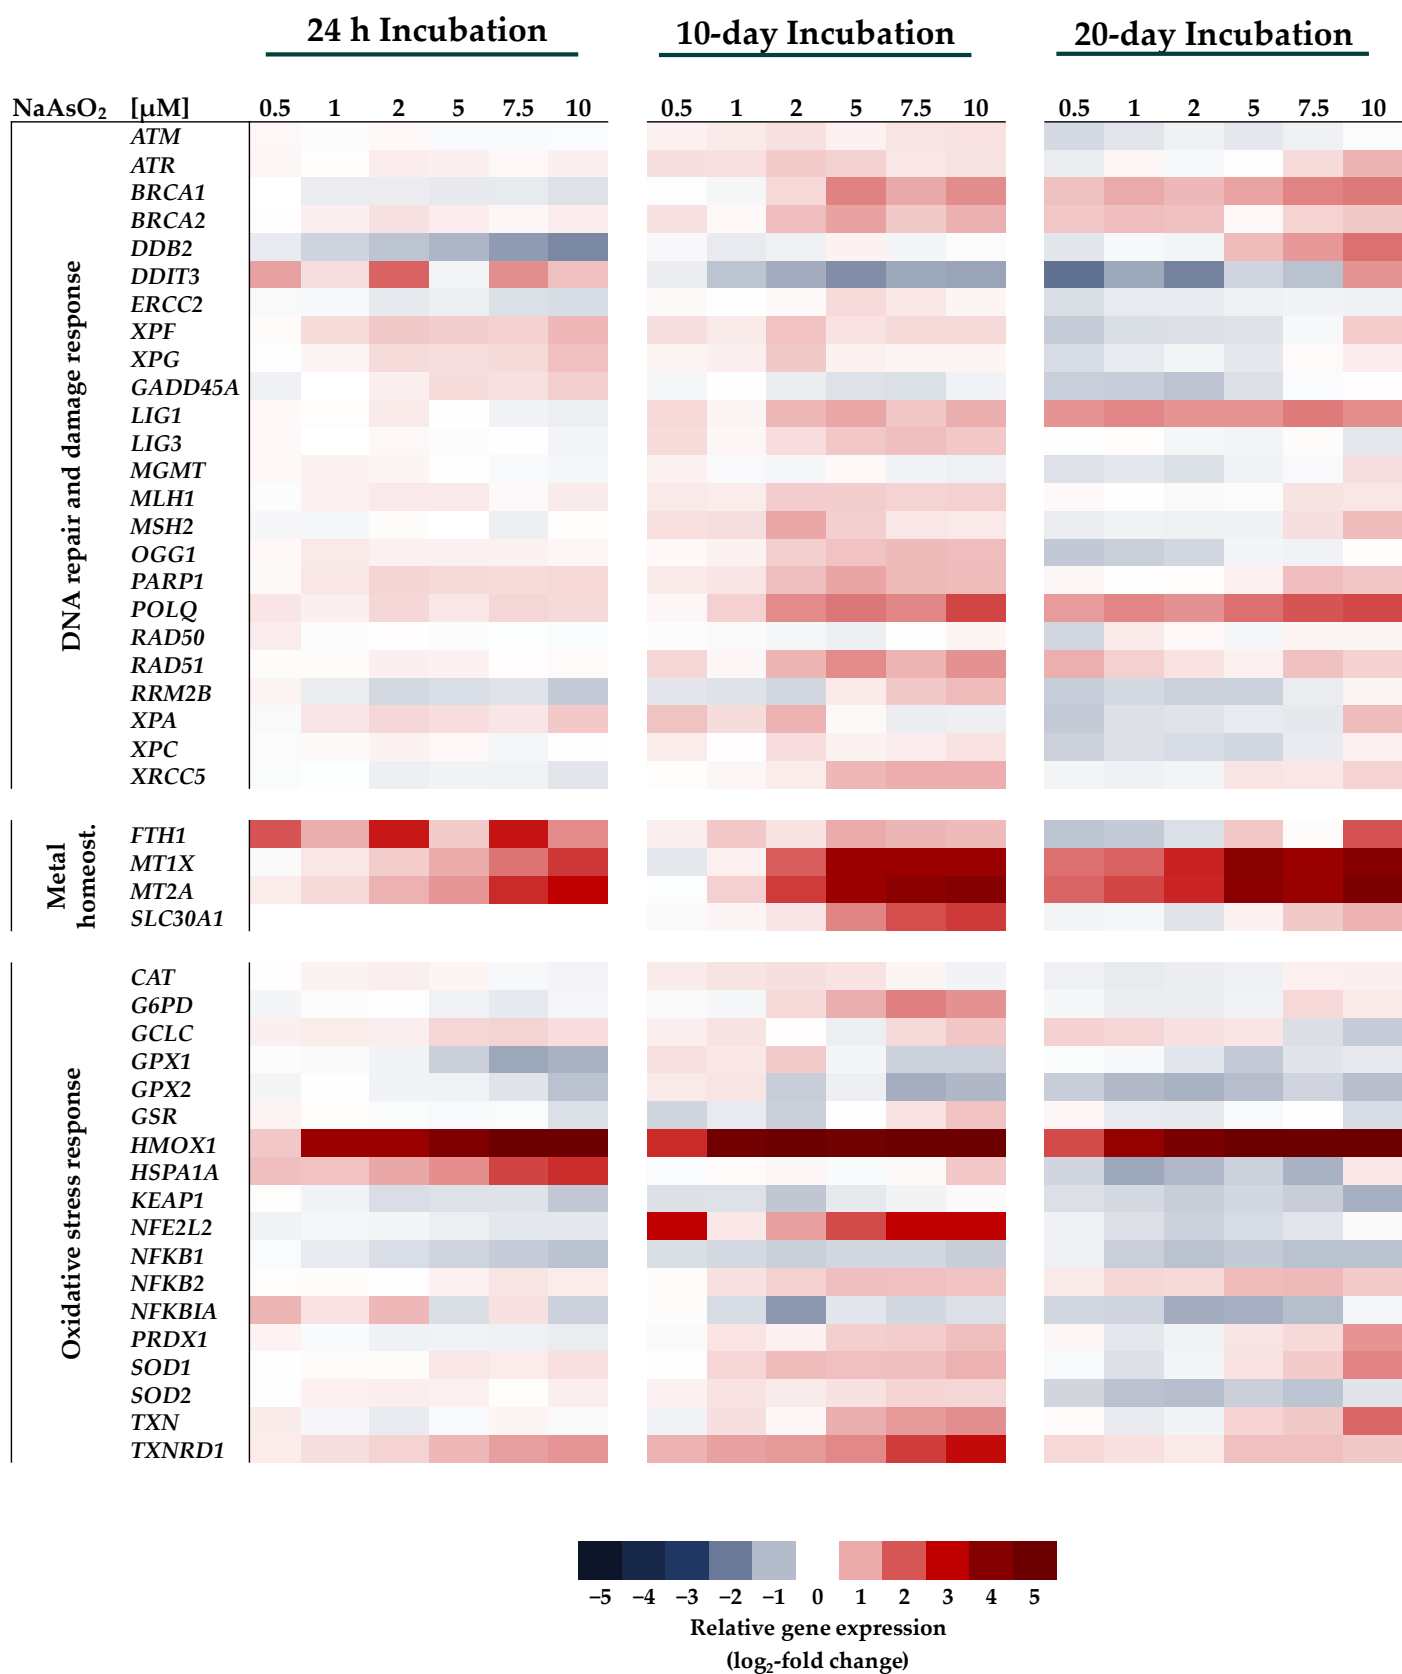

**Figure S3:** Gene expression profile of HepG2 cells after 24-hour, 10-day, and 20-day treatment with NaAsO<sub>2</sub>. The clusters of genes involved in metal homeostasis, response to oxidative stress, and DNA damage response are presented. The log<sub>2</sub>-fold changes are provided for three independent experiments, normalized to the untreated control, where the control is set to 0.
